# Supplementary material for: Can profiles of poly- and Perfluoroalkyl substances (PFASs) in human serum provide information on major exposure sources?
Source: PubMed Central journal article supplement (PMC5796515; doi:10.1186/s12940-018-0355-4), 2018-02-01
Supplement: 12940_2018_355_MOESM1_ESM.pdf [file 12940_2018_355_MOESM1_ESM.pdf]

## **Additional file 1: Supplementary figures, tables and information**

### **Can Profiles of Poly- and Perfluoroalkyl Substances (PFASs) in Human Serum Provide Information on Major Exposure Sources?**

Xindi C. Hu<sup>a,b,\*</sup>, Clifton Dassuncao<sup>a,b</sup>, Xianming Zhang<sup>b</sup>, Philippe Grandjean<sup>a,c</sup>, Flemming Nielsen<sup>c</sup>, Pal Weihe<sup>d</sup>, Glenys M. Webster<sup>e</sup>, Elsie M. Sunderland<sup>a,b</sup>

<sup>a</sup> Harvard T.H. Chan School of Public Health, Boston, Massachusetts 02215, United States

<sup>b</sup> Harvard John A. Paulson School of Engineering and Applied Sciences, Cambridge, Massachusetts 02138, United States

<sup>c</sup> University of Southern Denmark, DK-5000 Odense, Denmark

<sup>d</sup> The Faroese Hospital System, FR-100 Tórshavn, Faroe Islands

<sup>e</sup> Simon Fraser University, Burnaby, British Columbia V5A 1S6, Canada

Corresponding Author:

\*Phone: 1-617-496-4653. E-mail: xhu@mail.harvard.edu. Mail: 128 Pierce Hall, Harvard University, Cambridge, Massachusetts, United States 02138.

## Contents of this File:

| Contents                                                                                                                                                         | Page |
|------------------------------------------------------------------------------------------------------------------------------------------------------------------|------|
| Table S1. Characteristics of NHANES 2005-06 participants included in GAM analysis (unweighted, $n=2,120$ )                                                       | 3    |
| Table S2. Characteristics of CHirP participants included in GAM analysis ( $n=152$ )                                                                             | 4    |
| Table S3. Loadings of the first three principal components (PCs) after varimax rotation.                                                                         | 5    |
| Table S4. Screening predictors for PFASs in CHirP using univariate regression                                                                                    | 6    |
| Table S5 Associations between exposure behavioral factors and serum PFAS levels in NHANES 2005-06 population (parametric terms only)                             | 8    |
| Table S6 Associations between exposure behavioral factors and serum PFAS levels in the CHirP cohort (parametric terms only)                                      | 10   |
| Fig. S1. Sensitivity analysis for mean serum PFAS concentrations among three Faroese groups, collected in 2004-2007.                                             | 11   |
| Fig. S2. Mean serum PFAS composition (%) among three demographic groups in the Faroe Islands, 2004-07.                                                           | 12   |
| Fig. S3. The first and third principal components of Principal Component Analysis (PCA) on the serum PFAS profiles among Faroese whaling men, children and women | 13   |
| Fig. S4. Sensitivity analysis of PCA on the serum PFAS profiles among Faroese whaling men, children and women.                                                   | 14   |
| Fig. S5. Associations between exposure behavioral factors and serum PFAS levels in NHANES 2005-06 population (smooth terms only)                                 | 15   |
| Fig. S6. Associations between exposure behavioral factors and serum PFAS levels in CHirP cohort (smooth terms only)                                              | 16   |

Table S1. Characteristics of NHANES 2005-06 participants included in GAM analysis

(unweighted,  $n=2,120$ ).

|                                                         |                                        | Mean $\pm$ SD or N (%) |
|---------------------------------------------------------|----------------------------------------|------------------------|
| Age (years)                                             |                                        | 38.7 $\pm$ 22.1        |
| Sex                                                     | Male                                   | 1048 (49)              |
|                                                         | Female                                 | 1072 (51)              |
| Race/Ethnicity                                          | White                                  | 935 (44)               |
|                                                         | Black                                  | 544 (26)               |
|                                                         | Hispanic                               | 565 (27)               |
|                                                         | Other race/ethnicity or missing        | 76 (3)                 |
| Body Mass Index                                         |                                        | 27.0 $\pm$ 7.6         |
| Annual household income                                 |                                        | 41982 $\pm$ 23340      |
| Ever served in the Armed Forces of the US               | Yes                                    | 236 (11)               |
|                                                         | No                                     | 1884 (89)              |
| Born in the US                                          | Yes                                    | 1716 (81)              |
|                                                         | No                                     | 404 (19)               |
| Tap water sources                                       | Do not drink tap water                 | 378 (18)               |
|                                                         | Community water supply                 | 1240 (58)              |
|                                                         | Mixed source                           | 235 (11)               |
|                                                         | Well                                   | 267 (13)               |
| Floor type                                              | Fully or partially covered with carpet | 1956 (92)              |
|                                                         | Smooth                                 | 164 (8)                |
| Number of shellfish meals in past 30 days               |                                        | 1.6 $\pm$ 2.8          |
| Number of finfish meals in past 30 days                 |                                        | 2.7 $\pm$ 4.1          |
| Have ever breastfed children                            | Yes                                    | 333 (16)               |
|                                                         | No                                     | 1787 (84)              |
| Have ever been pregnant                                 | Yes                                    | 268 (13)               |
|                                                         | No                                     | 1852 (87)              |
| Had at least one menstrual period in the past 12 months | Yes                                    | 653 (31)               |
|                                                         | No                                     | 1467 (69)              |

Table S2. Characteristics of CHirP participants included in GAM analysis ( $n=152$ ).

|                                                                      | Mean $\pm$ SD or N (%) |
|----------------------------------------------------------------------|------------------------|
| Age (years)                                                          | 34.1 $\pm$ 3.8         |
| Race/Ethnicity                                                       |                        |
|                                                                      | Caucasian 124 (82)     |
|                                                                      | Non caucasian 28 (18)  |
| Annual household income (\$Cdn)                                      |                        |
|                                                                      | <29,000 9 (6)          |
|                                                                      | >29,000 133 (88)       |
|                                                                      | Missing 9 (7)          |
| Have had prior births                                                |                        |
|                                                                      | Yes 73 (48)            |
|                                                                      | No 79 (52)             |
| Have breastfed infants before                                        |                        |
|                                                                      | Yes 70 (46)            |
|                                                                      | No 82 (54)             |
| Microwave popcorn last year                                          | 6.6 $\pm$ 15.7         |
| Movie theater popcorn last year                                      | 3.5 $\pm$ 6.5          |
| Packaged foods last year                                             | 8.6 $\pm$ 20.8         |
| Paper cups last year                                                 | 138 $\pm$ 154.9        |
| Hours spent in a vehicle per week                                    | 6.5 $\pm$ 3.4          |
| Hours spent watching TV per week                                     | 10.0 $\pm$ 15.7        |
| Flight time over the past 3 years                                    | 75.0 $\pm$ 59.9        |
| Use ant bait inside home the past 3 years                            | 0.4 $\pm$ 1.4          |
| Use waterproof spray in the past 3 years                             | 1.3 $\pm$ 2.5          |
| Use waxes for leather in the past 3 years                            | 1.0 $\pm$ 4.6          |
| Use car waxes, sprays or polishes inside the car in the past 3 years | 0.8 $\pm$ 2.9          |
| Consuming shellfish in the past year                                 | 36.74 $\pm$ 56.3       |
| Consuming finfish in the past year                                   | 86.9 $\pm$ 77.9        |
| Use carpet stain repellent in the past 3 years                       |                        |
|                                                                      | Yes 5 (3)              |
|                                                                      | No 122 (80)            |
|                                                                      | Missing 25 (16)        |
| Use stove-top Teflon cookware                                        |                        |
|                                                                      | Yes 122 (80)           |
|                                                                      | No 30 (20)             |
| Use firefighting foam                                                |                        |
|                                                                      | Yes 11 (7)             |
|                                                                      | No 141 (93)            |

Table S3. Loadings of the first three principal components (PCs) after varimax rotation.

|          | Component 1 | Component 2 | Component 3 |
|----------|-------------|-------------|-------------|
| nPFOS    | 0.932       |             | 0.237       |
| brPFOS   | 0.928       | 0.211       | 0.106       |
| PFHxS    |             | 0.915       |             |
| PFUnDA   | 0.908       |             | 0.306       |
| PFNA     | 0.846       | 0.255       | 0.335       |
| PFOA     | 0.848       | -0.206      |             |
| PFDA     | 0.908       |             | 0.329       |
| PFHpS    | 0.768       | 0.416       | 0.23        |
| PFDoDA   | 0.871       |             | 0.324       |
| NMeFOSAA | 0.104       | 0.646       | -0.194      |
| PFHpA    | 0.247       | 0.743       | 0.12        |
| NEtFOSAA | -0.114      | 0.684       | 0.202       |
| nFOSA    | 0.406       |             | 0.841       |
| PFDS     | 0.461       | -0.3        | -0.225      |
| brFOSA   | 0.28        |             | 0.884       |

Table S4. Screening predictors for PFASs in the CHirP study using univariate regression.

|                                                          | PFOA  | PFOS  | PFNA  | PFHxS |
|----------------------------------------------------------|-------|-------|-------|-------|
| Microwave popcorn last year                              | 0.06  | 0.02  | 0.70  | 0.10  |
| Movie theater popcorn last year                          | 0.01  | <0.01 | 0.70  | 0.03  |
| Pizza deliveries last year                               | 0.71  | 0.91  | 0.81  | 0.03  |
| Takeout foods last year                                  | 0.40  | 0.55  | 0.35  | 0.47  |
| Packfood heated last year                                | 0.10  | 0.06  | 0.64  | 0.05  |
| Paper cups last year                                     | 0.09  | 0.75  | 0.10  | 0.06  |
| Hours spent in a vehicle per week                        | <0.01 | 0.04  | <0.01 | 0.07  |
| Hours spent outside per week                             | 0.84  | 0.39  | 0.95  | 0.55  |
| Hours spent at home per week                             | 0.04  | 0.14  | 0.23  | 0.40  |
| Hours spent inside per week                              | 0.30  | 0.44  | 0.24  | 0.58  |
| Hours spent watching TV per week                         | 0.03  | <0.01 | 0.03  | 0.24  |
| Hours spent on the phone per week                        | 0.86  | 0.62  | 0.38  | 0.37  |
| Flight time over the past 3 years                        | <0.01 | <0.01 | 0.01  | <0.01 |
| One-way flights over the past 3 years                    | 0.01  | 0.03  | 0.10  | 0.02  |
| Have had prior births                                    | <0.01 | <0.01 | <0.01 | <0.01 |
| Have breastfed infants before                            | <0.01 | <0.01 | <0.01 | <0.01 |
| Breastfed_as_baby_cleaned                                | 0.56  | 0.84  | 0.64  | 0.70  |
| Mat_age_cleaned                                          | 0.03  | 0.01  | 0.02  | 0.34  |
| Education                                                | 0.39  | 0.54  | 0.90  | 0.75  |
| Annual household income (\$Cdn)                          | 0.27  | 0.25  | 0.51  | 0.30  |
| Race/Ethnicity                                           | 0.69  | 0.81  | 0.21  | <0.01 |
| Mattress age(years)                                      | 0.75  | 0.31  | 0.07  | 0.02  |
| Stain repellent applied to the mattress                  | 0.25  | 0.21  | 0.65  | 0.38  |
| Cooking by you                                           | 0.52  | 0.12  | 0.65  | 0.28  |
| Oven_selfclean_yn                                        | 0.05  | 0.29  | 0.39  | 0.61  |
| Is there any carpet in your home?                        | 0.55  | 0.31  | 0.75  | 0.19  |
| % of home that is carpeted                               | 0.74  | 0.74  | 0.80  | 0.78  |
| Carpets have been cleaned in the past 3 years            | 0.99  | 0.75  | 0.98  | 0.78  |
| Stain repellent applied to carpets in the past 3 years   | 0.75  | 0.06  | 0.01  | 0.12  |
| Furniture has been cleaned in the past 3 years           | 0.88  | 0.85  | 0.19  | 0.74  |
| Stain repellent applied to furniture in the past 3 years | 0.34  | 0.99  | 0.49  | 0.64  |
| Goretex clothing use                                     | 0.32  | 0.18  | 0.34  | 0.10  |
| Fire extinguisher use                                    | 0.73  | 0.74  | 0.04  | 0.86  |
| Shred-resistant dental floss use                         | 0.54  | 0.52  | 0.90  | 0.35  |
| Bite nails                                               | 0.96  | 0.33  | 0.65  | 0.61  |
| Use of a non-stick or Teflon pan                         | 0.22  | 0.02  | 0.38  | 0.04  |
| Use ant bait inside homes                                | 0.04  | 0.02  | 0.16  | 0.82  |
| Use pesticides inside homes                              | 0.36  | 0.36  | 0.77  | 0.64  |
| Use waterproof spray in the past 3 years                 | 0.07  | 0.65  | 0.45  | 0.19  |
| Use air fresheners in the past 3 years                   | 0.29  | 0.58  | 0.85  | 0.45  |

|                                                                        |      |      |       |      |
|------------------------------------------------------------------------|------|------|-------|------|
| Use waxes for leather goods in the past 3 years                        | 0.28 | 0.32 | 0.04  | 0.89 |
| Use shoe polish in the past 3 years                                    | 0.52 | 0.95 | 0.53  | 0.90 |
| Use anti-static sprays in the past 3 years                             | 0.09 | 0.16 | 0.34  | 0.25 |
| Use stain removers in the past 3 years                                 | 0.54 | 0.27 | 0.13  | 0.75 |
| Use car waxes, or polishes inside the car in the past 3 years          | 0.09 | 0.25 | 0.06  | 0.03 |
| Use car waxes, or polishes outside the car in the past 3 years         | 0.75 | 0.59 | 0.52  | 0.70 |
| Consuming finfish in the past year                                     | 0.93 | 0.23 | 0.23  | 0.23 |
| Consuming shellfish in the past year                                   | 0.05 | 0.03 | <0.01 | 0.99 |
| Number of years of consuming fish at least once per month since age 10 | 0.04 | 0.10 | 0.31  | 0.12 |

*p-value <0.05*   *p-value <0.10*

Table S5 Associations between exposure behavioral factors and serum PFAS levels in NHANES 2005-06 population (parametric terms only).

| Percent difference in PFAS concentrations (%)  | PFOS             | PFOA             | PFNA             | PFHxS            | PFDA             | N-MeFOSAA        |
|------------------------------------------------|------------------|------------------|------------------|------------------|------------------|------------------|
| <i>p-value</i>                                 |                  |                  |                  |                  |                  |                  |
| <i>Variables representing exposure sources</i> |                  |                  |                  |                  |                  |                  |
| Ever served in the Armed Forces of the US      |                  |                  |                  |                  |                  |                  |
| No                                             | Ref              | Ref              | Ref              | Ref              | Ref              | Ref              |
| Yes                                            | -9.24            | -11.27           | -7.24            | -17.89           | -5.83            | -6.59            |
|                                                | <i>0.076</i>     | <b>0.033</b>     | <i>0.183</i>     | <b>0.028</b>     | <i>0.314</i>     | <i>0.292</i>     |
| Tap water sources                              |                  |                  |                  |                  |                  |                  |
| Do not drink tap water                         | Ref              | Ref              | Ref              | Ref              | Ref              | Ref              |
| Community water supply                         | 9.72             | 12.92            | 4.00             | 19.78            | 5.37             | 17.93            |
|                                                | <b>0.018</b>     | <b>0.003</b>     | <i>0.335</i>     | <b>0.005</b>     | <i>0.225</i>     | <b>&lt;0.001</b> |
| Mixed source                                   | -3.00            | 2.15             | 6.40             | -5.46            | 12.51            | 3.35             |
|                                                | <i>0.587</i>     | <i>0.712</i>     | <i>0.285</i>     | <i>0.543</i>     | <i>0.055</i>     | <i>0.621</i>     |
| Well                                           | -1.36            | -9.57            | -10.65           | -13.14           | 2.03             | 10.45            |
|                                                | <i>0.805</i>     | <i>0.078</i>     | <i>0.050</i>     | <i>0.123</i>     | <i>0.741</i>     | <i>0.132</i>     |
| Floor type                                     |                  |                  |                  |                  |                  |                  |
| Smooth                                         | Ref              | Ref              | Ref              | Ref              | Ref              | Ref              |
| Fully or partially covered with carpet         | 12.24            | 6.39             | 9.52             | 37.19            | 8.89             | 17.20            |
|                                                | <b>0.032</b>     | <i>0.263</i>     | <i>0.102</i>     | <b>&lt;0.001</b> | <i>0.148</i>     | <b>0.013</b>     |
| <i>Other variables</i>                         |                  |                  |                  |                  |                  |                  |
| Born in the US                                 |                  |                  |                  |                  |                  |                  |
| No                                             | Ref              | Ref              | Ref              | Ref              | Ref              | Ref              |
| Yes                                            | 31.70            | 40.50            | 2.59             | 45.40            | -3.69            | 27.68            |
|                                                | <b>&lt;0.001</b> | <b>&lt;0.001</b> | <i>0.585</i>     | <b>&lt;0.001</b> | <i>0.448</i>     | <b>&lt;0.001</b> |
| Sex                                            |                  |                  |                  |                  |                  |                  |
| Male                                           | Ref              | Ref              | Ref              | Ref              | Ref              | Ref              |
| Female                                         | -23.16           | -15.74           | -10.85           | -25.68           | -9.45            | -11.96           |
|                                                | <b>&lt;0.001</b> | <b>&lt;0.001</b> | <b>0.015</b>     | <b>&lt;0.001</b> | <b>0.047</b>     | <b>0.019</b>     |
| Race/Ethnicity                                 |                  |                  |                  |                  |                  |                  |
| White                                          | Ref              | Ref              | Ref              | Ref              | Ref              | Ref              |
| Black                                          | 9.88             | -16.67           | 9.73             | -11.87           | 17.39            | 1.12             |
|                                                | <b>0.015</b>     | <b>&lt;0.001</b> | <b>0.020</b>     | <b>0.046</b>     | <b>&lt;0.001</b> | <i>0.807</i>     |
| Hispanic                                       | -16.41           | -18.41           | -16.66           | -10.48           | -9.68            | -19.82           |
|                                                | <b>&lt;0.001</b> | <b>&lt;0.001</b> | <b>&lt;0.001</b> | <i>0.132</i>     | <b>0.038</b>     | <b>&lt;0.001</b> |
| Other race/ethnicity                           | -8.50            | -9.26            | -2.91            | -1.05            | 7.36             | -5.20            |
|                                                | <i>0.266</i>     | <i>0.235</i>     | <i>0.721</i>     | <i>0.936</i>     | <i>0.416</i>     | <i>0.573</i>     |
| Breastfed children                             |                  |                  |                  |                  |                  |                  |
| No                                             | Ref              | Ref              | Ref              | Ref              | Ref              | Ref              |
| Yes                                            | -4.82            | -8.33            | -7.27            | 0.84             | -8.31            | 1.19             |



|                                                         |                     |                         |                     |                     |              |              |
|---------------------------------------------------------|---------------------|-------------------------|---------------------|---------------------|--------------|--------------|
|                                                         | <i>0.282</i>        | <i>0.064</i>            | <i>0.111</i>        | <i>0.911</i>        | <i>0.084</i> | <i>0.828</i> |
| Have ever been pregnant                                 |                     |                         |                     |                     |              |              |
| No                                                      | Ref                 | Ref                     | Ref                 | Ref                 | Ref          | Ref          |
| Yes                                                     | -4.36               | -6.36                   | 0.55                | -18.70              | 6.64         | -6.27        |
|                                                         | <i>0.345</i>        | <i>0.175</i>            | <i>0.911</i>        | <b><i>0.008</i></b> | <i>0.213</i> | <i>0.247</i> |
| Had at least one menstrual period in the past 12 months |                     |                         |                     |                     |              |              |
| No                                                      | Ref                 | Ref                     | Ref                 | Ref                 | Ref          | Ref          |
| Yes                                                     | -13.90              | -26.19                  | -14.47              | -16.64              | -7.90        | 0.71         |
|                                                         | <b><i>0.002</i></b> | <b><i>&lt;0.001</i></b> | <b><i>0.002</i></b> | <b><i>0.023</i></b> | <i>0.120</i> | <i>0.902</i> |
| Adjusted R-square                                       | 0.25                | 0.19                    | 0.11                | 0.10                | 0.09         | 0.09         |

Table S6 Associations between exposure behavioral factors and serum PFAS levels in CHirP cohort (parametric terms only).

| Percent difference in PFAS concentrations (%)<br><i>p-value</i> | PFOS                   | PFOA                   | PFNA                   | PFHxS                  |
|-----------------------------------------------------------------|------------------------|------------------------|------------------------|------------------------|
| Use carpet stain repellent in the past 3 years                  |                        |                        |                        |                        |
| No                                                              | Ref                    | Ref                    | Ref                    | Ref                    |
| Yes                                                             | 52.87<br><i>0.054</i>  | 17.36<br><i>0.408</i>  | 75.13<br><b>0.001</b>  | 68.50<br><i>0.121</i>  |
| Use stove-top Teflon cookware                                   |                        |                        |                        |                        |
| No                                                              | Ref                    | Ref                    | Ref                    | Ref                    |
| Yes                                                             | 15.57<br><i>0.174</i>  | 12.93<br><i>0.196</i>  | -2.60<br><i>0.740</i>  | 41.39<br><b>0.034</b>  |
| Use firefighting foam                                           |                        |                        |                        |                        |
| No                                                              | Ref                    | Ref                    | Ref                    | Ref                    |
| Yes                                                             | -5.67<br><i>0.730</i>  | -4.59<br><i>0.746</i>  | -19.78<br><i>0.076</i> | 2.80<br><i>0.915</i>   |
| Race/Ethnicity                                                  |                        |                        |                        |                        |
| Caucasian                                                       | Ref                    | Ref                    | Ref                    | Ref                    |
| Non Caucasian                                                   | -15.68<br><i>0.118</i> | -25.12<br><b>0.003</b> | 0.98<br><i>0.903</i>   | -38.75<br><b>0.005</b> |
| Have had prior pregnancy                                        |                        |                        |                        |                        |
| No                                                              | Ref                    | Ref                    | Ref                    | Ref                    |
| Yes                                                             | 27.55<br><i>0.572</i>  | -18.43<br><i>0.597</i> | -22.33<br><i>0.444</i> | -39.62<br><i>0.449</i> |
| Have breastfed infants before                                   |                        |                        |                        |                        |
| No                                                              | Ref                    | Ref                    | Ref                    | Ref                    |
| Yes                                                             | -50.69<br><i>0.100</i> | -45.95<br><i>0.111</i> | -6.15<br><i>0.846</i>  | -14.12<br><i>0.819</i> |
| Adjusted R-square                                               | 0.44                   | 0.58                   | 0.45                   | 0.34                   |

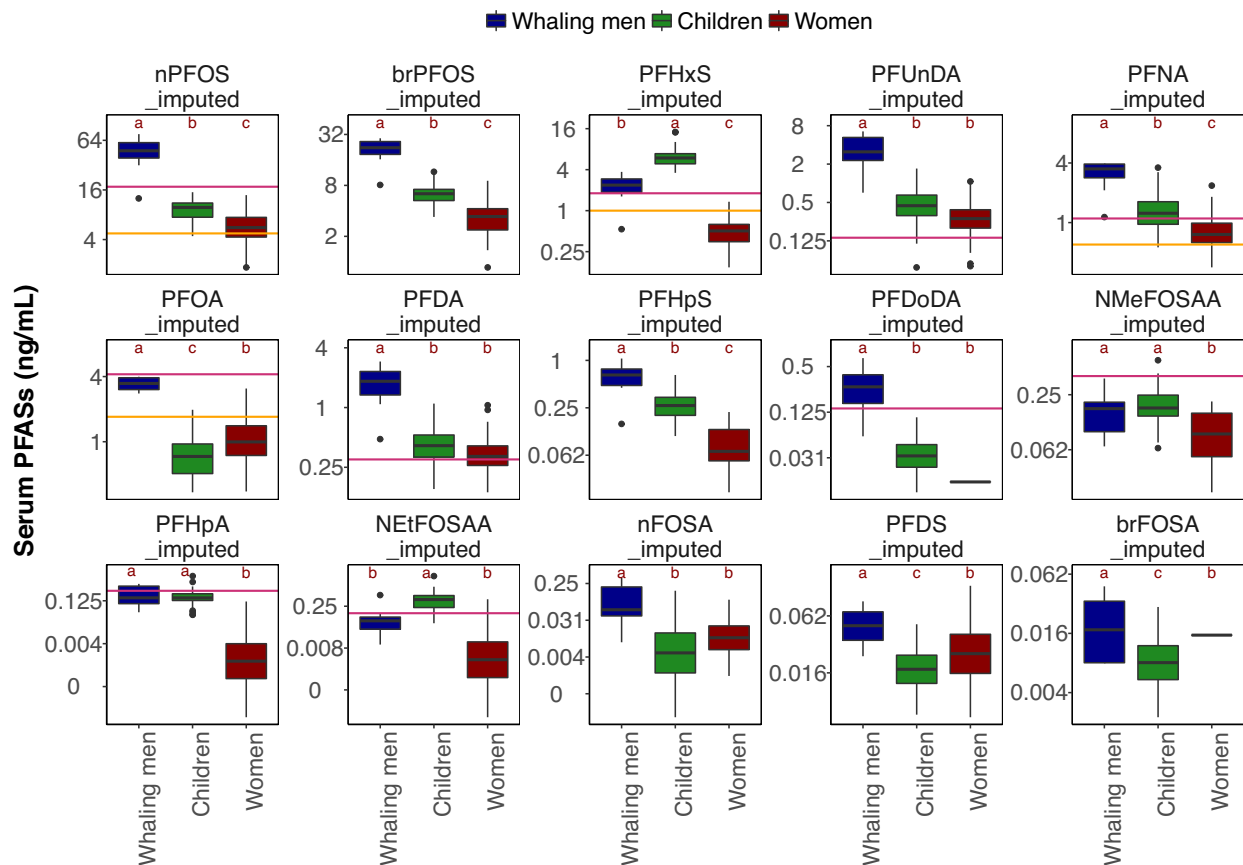

Fig. S1. Sensitivity analysis for mean serum PFAS concentrations among three Faroese groups, collected in 2004-2007. Left-censored data were imputed using the robust regression on order statistics (ROS). Red lines indicate median levels for the general U.S. population from the 2005-06 National Health and Nutrition Examination Survey (NHANES) and orange lines show median levels measured in pregnant women that participated in the Chemicals, Health and Pregnancy (CHirP) cohort in Vancouver, British Columbia, Canada in 2007-08. Means with the same letter are not significantly different (Tukey HSD test,  $\alpha = 0.05$ ). PFOS and FOSA for NHANES and CHirP are plotted with linear (nPFOS and nFOSA) isomer measurements for the Faroese data because isomer-specific data are unavailable.

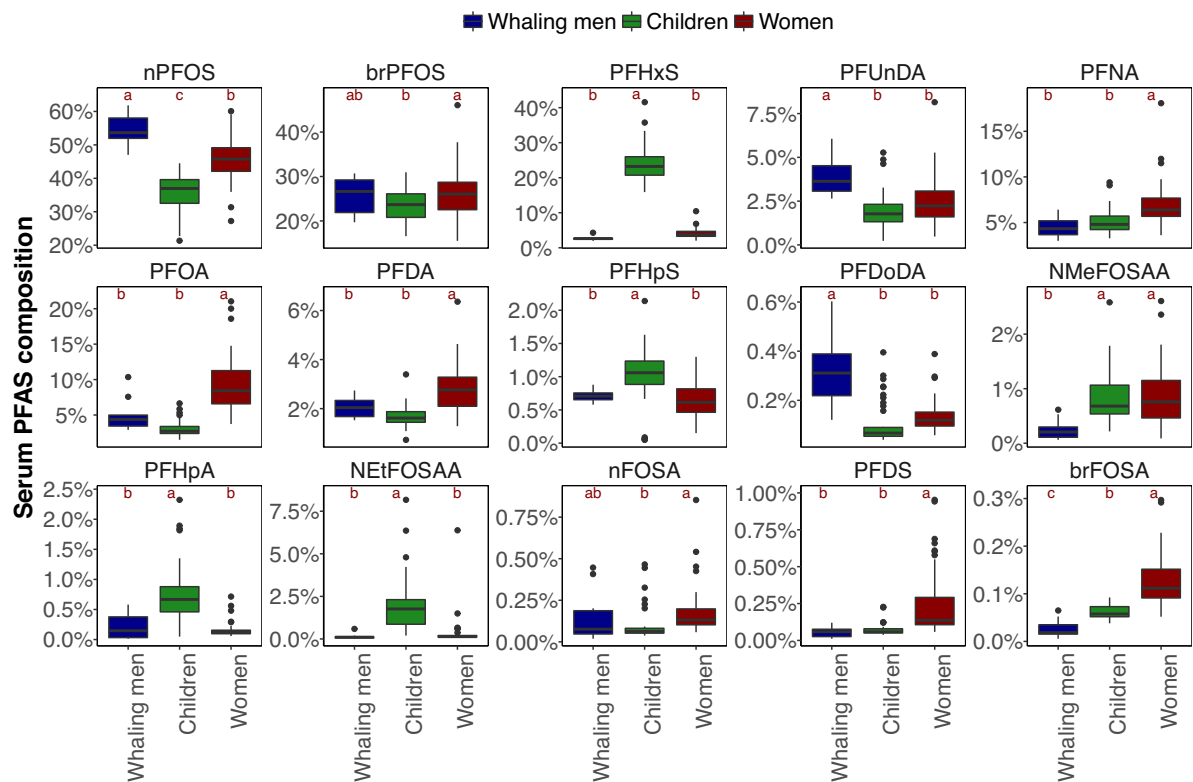

Fig. S2. Mean serum PFAS composition (%) among three demographic groups in the Faroe Islands, 2004-07. Means with the same letter are not significantly different (Tukey HSD test,  $\alpha = 0.05$ ).

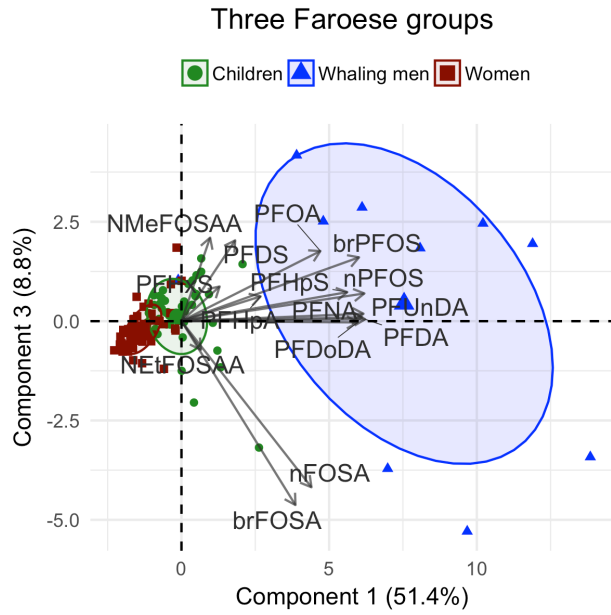

Fig. S3. The first and third principal components of Principal Component Analysis (PCA) on the serum PFAS profiles among Faroese whaling men, children and women.

### Three Faroese groups (ROS imputed)

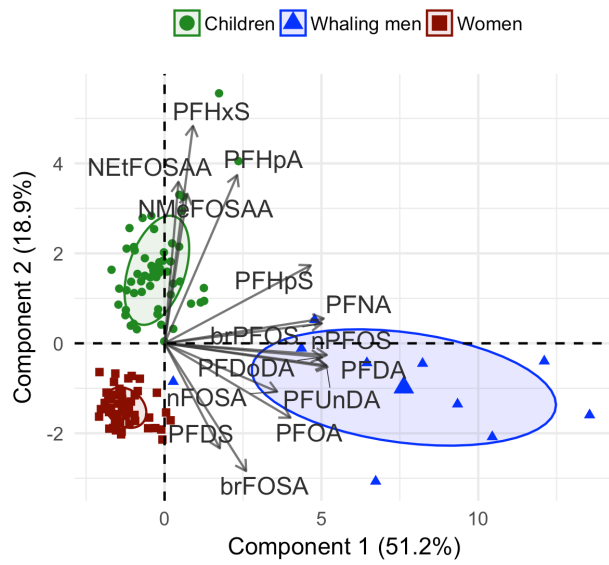

Fig. S4. Sensitivity analysis of PCA on the serum PFAS profiles among Faroese whaling men, children and women. Left-censored data were imputed using the robust regression on order statistics (ROS).

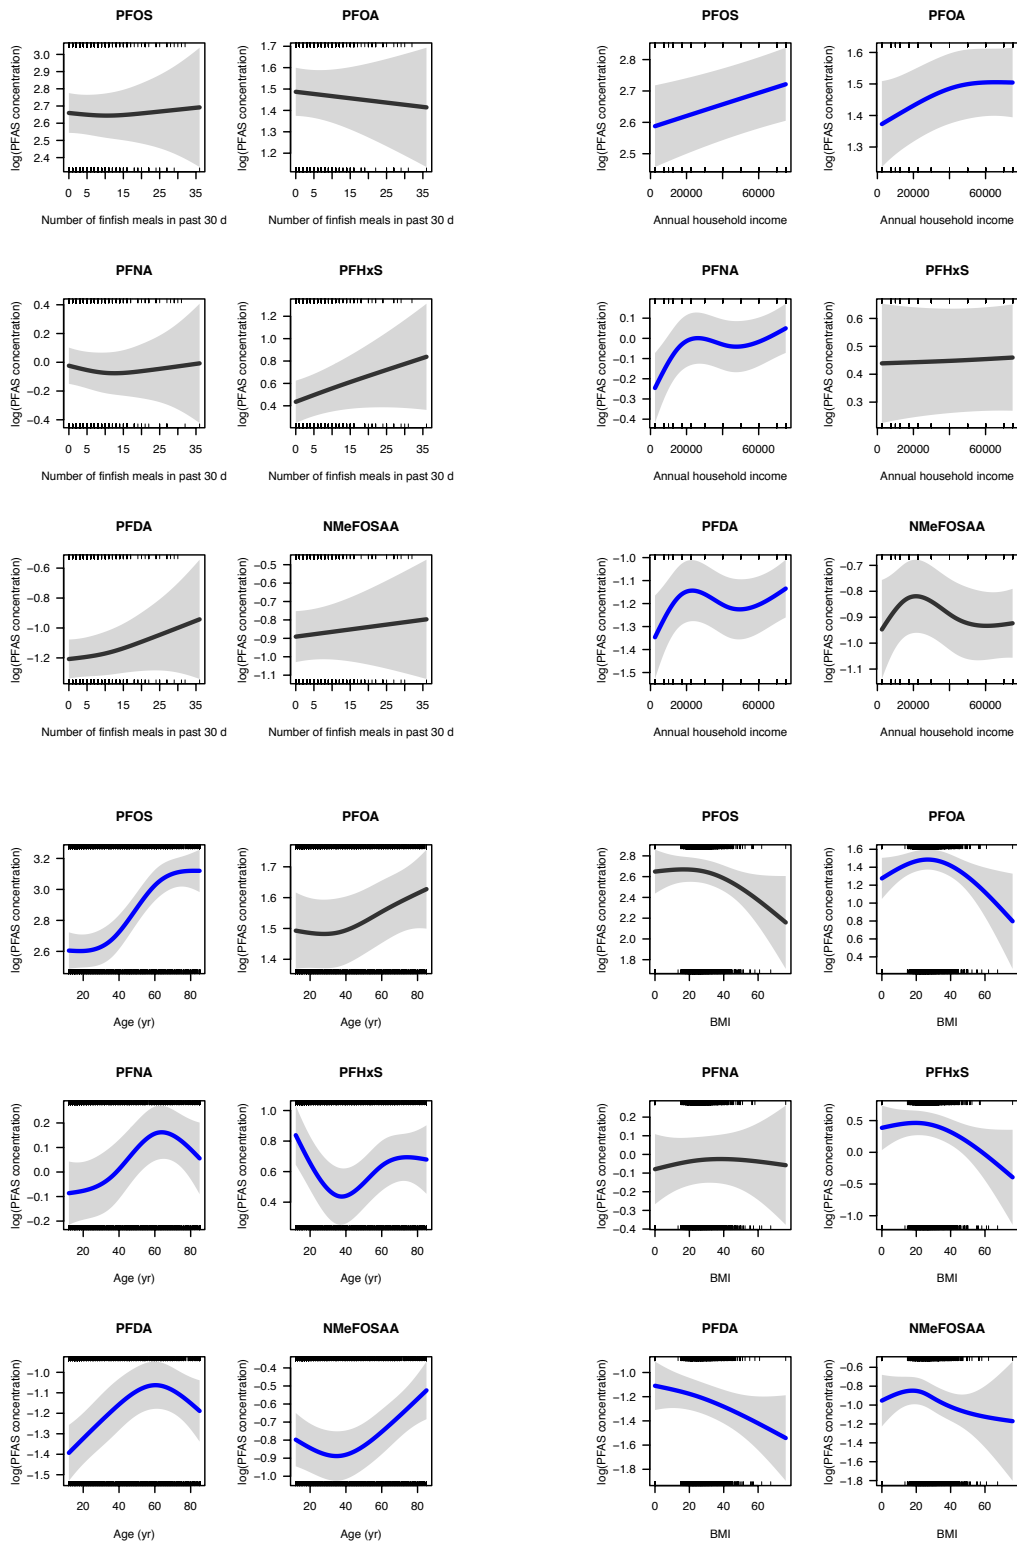

Fig. S5. Associations between exposure behavioral factors and serum PFAS levels in NHANES 2005-06 population (smooth terms only)

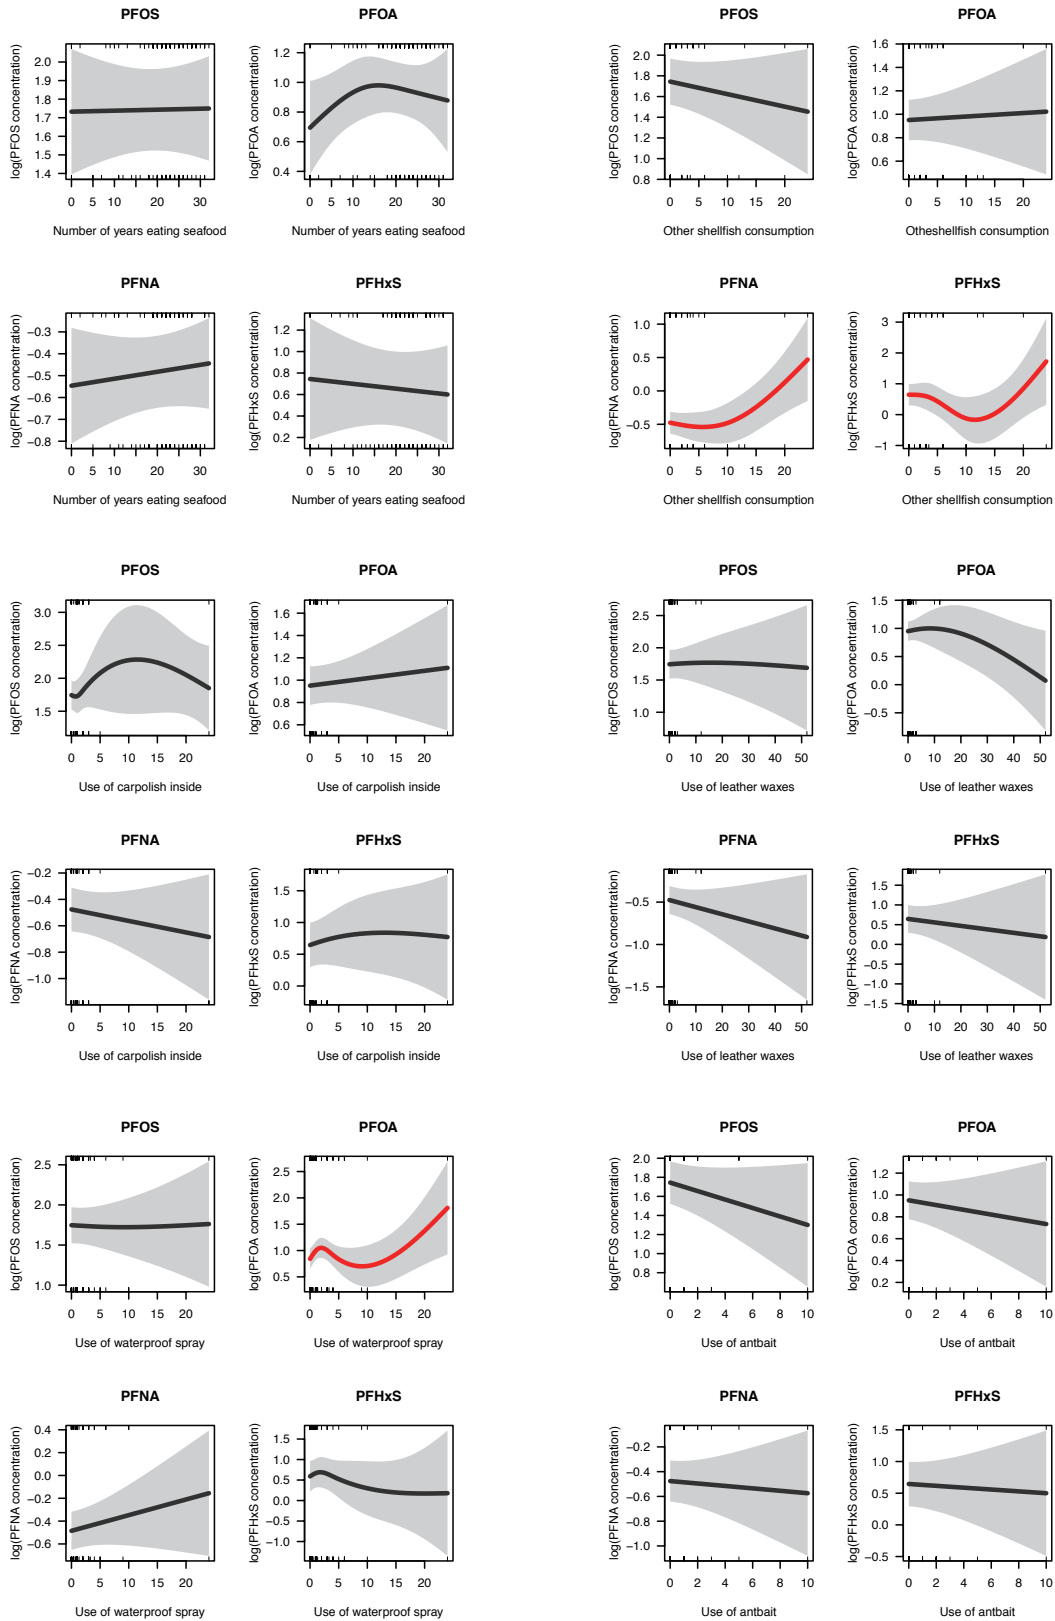

Fig. S6. Associations between exposure behavioral factors and serum PFAS levels in CHiP cohort (smooth terms only)



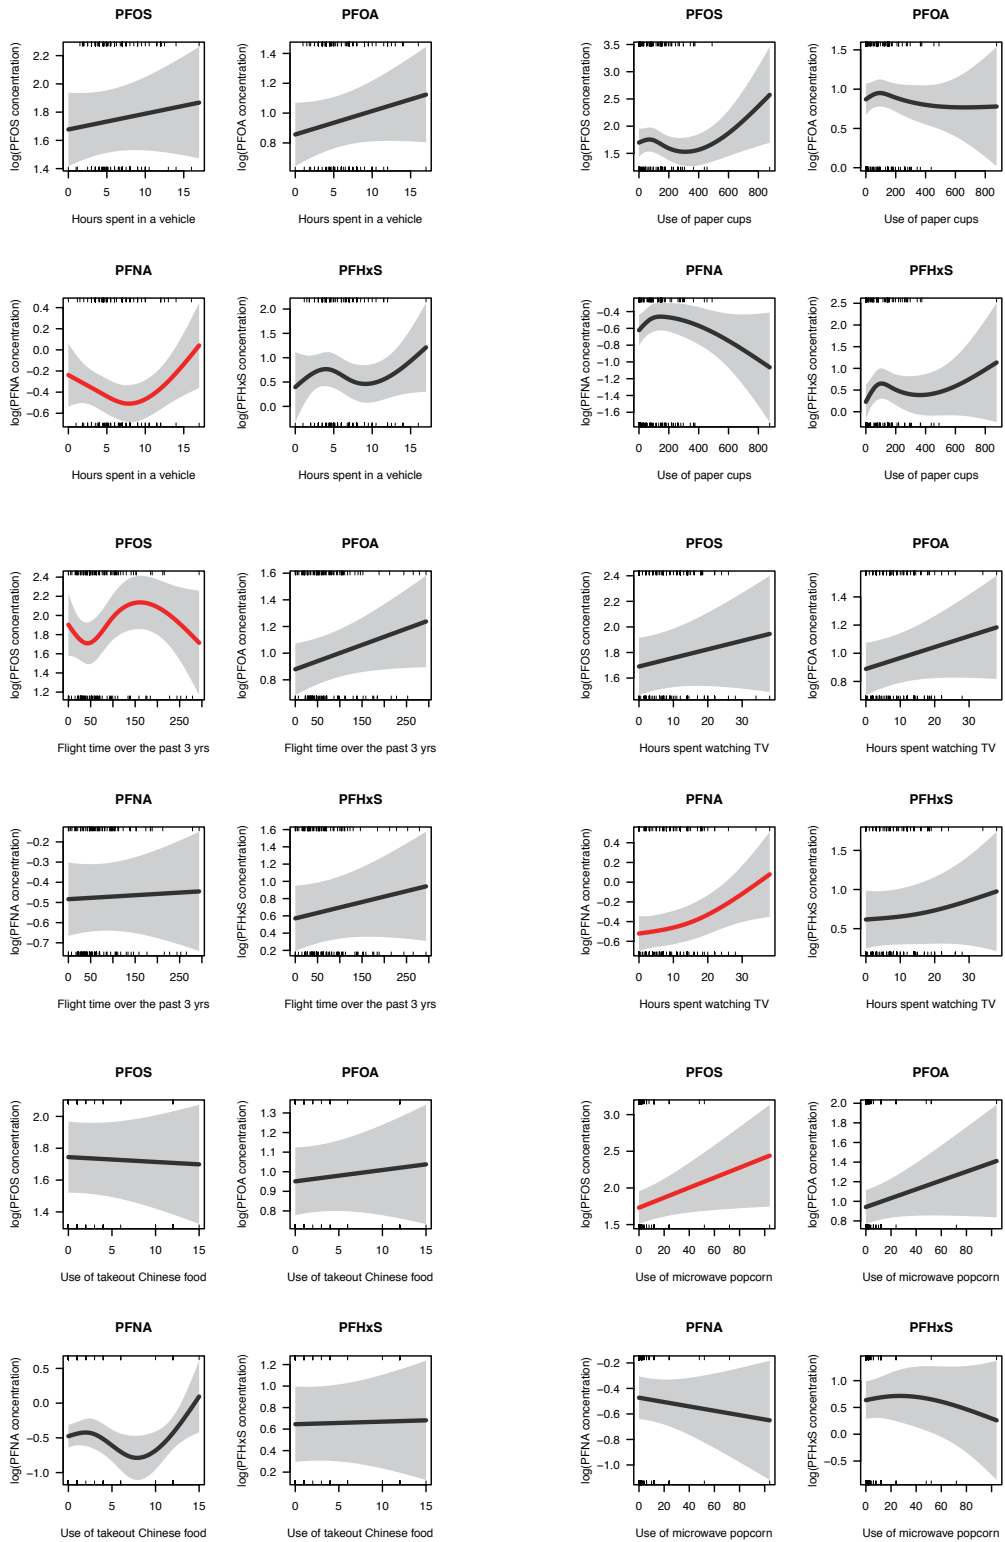

Fig. S6 (cont). Associations between exposure behavioral factors and serum PFAS levels in CHiP cohort (smooth terms only)
